# Supplementary material for: Research on the Spatio-Temporal Changes and Spatial Correlation Network of Low-Carbon Economic Development Level in Xinjiang ,China
Source: Research Square preprint supplement (doi:10.21203/rs.3.rs-7891953/v1), 2025-11-27
Supplement: Supplementary file 1 [file e7a1f56cf017424857c91dba.docx]

Table 2 Measurement Table of Low-Carbon Economic Development Levels in Various Prefectures and Cities

| Year | Karamay | Urumqi | Turpan Prefecture | Hami Prefecture | Changji Hui Autonomous Prefecture | Bortala Mongolian Autonomous Prefecture | Bayingolin Mongolian Autonomous Prefecture | Aksu Prefecture | Kizilsu Kirgiz Autonomous Prefecture | Kashgar Prefecture | Hotan Prefecture | Yili Kazak Autonomous Prefecture | Tacheng Prefecture | Altay Prefecture |
| --- | --- | --- | --- | --- | --- | --- | --- | --- | --- | --- | --- | --- | --- | --- |
| 2000 | 0.0542 | 0.0959 | 0.0386 | 0.0508 | 0.0477 | 0.0401 | 0.0438 | 0.0508 | 0.0436 | 0.0480 | 0.0465 | 0.0485 | 0.0466 | 0.0370 |
| 2001 | 0.0571 | 0.1026 | 0.0417 | 0.0549 | 0.0485 | 0.0437 | 0.0493 | 0.0566 | 0.0649 | 0.0528 | 0.0548 | 0.0516 | 0.0498 | 0.0436 |
| 2002 | 0.0552 | 0.1097 | 0.0435 | 0.0568 | 0.0508 | 0.0469 | 0.0502 | 0.0582 | 0.0596 | 0.0560 | 0.0597 | 0.0535 | 0.0507 | 0.0441 |
| 2003 | 0.0572 | 0.1163 | 0.0512 | 0.0617 | 0.0539 | 0.0511 | 0.0488 | 0.0584 | 0.0612 | 0.0608 | 0.0566 | 0.0532 | 0.0536 | 0.0463 |
| 2004 | 0.0655 | 0.1126 | 0.0531 | 0.0638 | 0.0565 | 0.0532 | 0.0559 | 0.0636 | 0.0592 | 0.0629 | 0.0560 | 0.0570 | 0.0569 | 0.0461 |
| 2005 | 0.0741 | 0.1252 | 0.0498 | 0.0716 | 0.0628 | 0.0806 | 0.0609 | 0.0632 | 0.0661 | 0.0644 | 0.0577 | 0.0620 | 0.0569 | 0.0515 |
| 2006 | 0.0807 | 0.1301 | 0.0626 | 0.0733 | 0.0668 | 0.0822 | 0.0684 | 0.0712 | 0.0664 | 0.0726 | 0.0640 | 0.0651 | 0.0600 | 0.0535 |
| 2007 | 0.0848 | 0.1414 | 0.0567 | 0.0748 | 0.0706 | 0.0820 | 0.0729 | 0.0751 | 0.0686 | 0.0787 | 0.0630 | 0.0674 | 0.0597 | 0.0533 |
| 2008 | 0.0957 | 0.1477 | 0.0596 | 0.0712 | 0.0798 | 0.0861 | 0.0770 | 0.0784 | 0.0660 | 0.0801 | 0.0682 | 0.0721 | 0.0640 | 0.0552 |
| 2009 | 0.0889 | 0.1661 | 0.0590 | 0.0753 | 0.0840 | 0.0793 | 0.0768 | 0.0778 | 0.0689 | 0.0788 | 0.0724 | 0.0759 | 0.0632 | 0.0588 |
| 2010 | 0.1134 | 0.1929 | 0.0643 | 0.0787 | 0.0895 | 0.0722 | 0.0867 | 0.0799 | 0.0670 | 0.0791 | 0.0737 | 0.0822 | 0.0668 | 0.0629 |
| 2011 | 0.1162 | 0.2282 | 0.0691 | 0.0930 | 0.1040 | 0.0765 | 0.0955 | 0.0882 | 0.0660 | 0.0818 | 0.0761 | 0.0917 | 0.0779 | 0.0731 |
| 2012 | 0.1211 | 0.2479 | 0.0807 | 0.0992 | 0.1238 | 0.0840 | 0.1033 | 0.0992 | 0.0698 | 0.0865 | 0.0747 | 0.1019 | 0.0891 | 0.0658 |
| 2013 | 0.1359 | 0.2794 | 0.0841 | 0.1068 | 0.1489 | 0.0862 | 0.1119 | 0.1030 | 0.0707 | 0.0910 | 0.0782 | 0.1086 | 0.0959 | 0.0686 |
| 2014 | 0.1581 | 0.3036 | 0.0907 | 0.1231 | 0.1791 | 0.0925 | 0.1193 | 0.1095 | 0.0739 | 0.0943 | 0.0855 | 0.1166 | 0.1030 | 0.0798 |
| 2015 | 0.1538 | 0.3431 | 0.1008 | 0.1508 | 0.1938 | 0.0969 | 0.1242 | 0.1154 | 0.0812 | 0.1041 | 0.0978 | 0.1279 | 0.1082 | 0.0884 |
| 2016 | 0.1607 | 0.4049 | 0.1040 | 0.1615 | 0.1989 | 0.1006 | 0.1298 | 0.1178 | 0.0839 | 0.1160 | 0.0976 | 0.1340 | 0.1106 | 0.0917 |
| 2017 | 0.1674 | 0.4445 | 0.1089 | 0.1693 | 0.2202 | 0.1041 | 0.1335 | 0.1219 | 0.0771 | 0.1143 | 0.0953 | 0.1369 | 0.1178 | 0.0998 |
| 2018 | 0.1864 | 0.4496 | 0.1286 | 0.1803 | 0.2404 | 0.1095 | 0.1499 | 0.1319 | 0.0877 | 0.1307 | 0.1033 | 0.1491 | 0.1179 | 0.1003 |
| 2019 | 0.2095 | 0.5277 | 0.1306 | 0.1976 | 0.2682 | 0.1135 | 0.1499 | 0.1488 | 0.0892 | 0.1294 | 0.1189 | 0.1674 | 0.1245 | 0.1038 |
| 2020 | 0.2335 | 0.5494 | 0.1457 | 0.2069 | 0.2889 | 0.1122 | 0.1642 | 0.1498 | 0.1014 | 0.1359 | 0.1290 | 0.1709 | 0.1323 | 0.1051 |
| 2021 | 0.2165 | 0.5566 | 0.1415 | 0.2243 | 0.3140 | 0.1124 | 0.1449 | 0.1553 | 0.0950 | 0.1338 | 0.1155 | 0.1706 | 0.1371 | 0.1070 |
| 2022 | 0.2436 | 0.5364 | 0.1496 | 0.2588 | 0.3479 | 0.1217 | 0.1530 | 0.1698 | 0.0915 | 0.1389 | 0.1201 | 0.1822 | 0.1503 | 0.1124 |
| 2023 | 0.2556 | 0.5594 | 0.1809 | 0.2616 | 0.4360 | 0.1489 | 0.1654 | 0.3347 | 0.1114 | 0.1565 | 0.1222 | 0.1962 | 0.1514 | 0.1125 |
